# Supplementary material
Source: publisher figshare collection journal article supplement (https://acs.figshare.com/ndownloader/files/4606045)
Supplement: Supplementary file 1 [file 4606045]

 
data_shelxl 
 
_audit_creation_method            SHELXL-97 
_chemical_name_systematic 
; 
 ? 
; 
_chemical_name_common             ? 
_chemical_melting_point           ? 
_chemical_formula_moiety          ? 
_chemical_formula_sum 
 'Ce2 Ga12 Ni' 
_chemical_formula_weight          1175.59 
 
loop_ 
 _atom_type_symbol 
 _atom_type_description 
 _atom_type_scat_dispersion_real 
 _atom_type_scat_dispersion_imag 
 _atom_type_scat_source 
 'Ce'  'Ce'  -0.2486   2.6331 
 'International Tables Vol C Tables 4.2.6.8 and 6.1.1.4' 
 'Ni'  'Ni'   0.3393   1.1124 
 'International Tables Vol C Tables 4.2.6.8 and 6.1.1.4' 
 'Ga'  'Ga'   0.2307   1.6083 
 'International Tables Vol C Tables 4.2.6.8 and 6.1.1.4' 
 
_symmetry_cell_setting            'tetragonal'   
_symmetry_space_group_name_H-M    'P 4/n b m'   
 
loop_ 
 _symmetry_equiv_pos_as_xyz 
 'x, y, z' 
 '-x+1/2, -y+1/2, z' 
 'x, -y+1/2, -z' 
 '-x+1/2, y, -z' 
 '-y+1/2, -x+1/2, -z' 
 'y, x, -z' 
 'y, -x+1/2, z' 
 '-y+1/2, x, z' 
 '-x, -y, -z' 
 'x-1/2, y-1/2, -z' 
 '-x, y-1/2, z' 
 'x-1/2, -y, z' 
 'y-1/2, x-1/2, z' 
 '-y, -x, z' 
 '-y, x-1/2, -z' 
 'y-1/2, -x, -z' 
 
_cell_length_a                    6.036(2) 
_cell_length_b                    6.036(2) 
_cell_length_c                    15.506(8) 
_cell_angle_alpha                 90.00 
_cell_angle_beta                  90.00 
_cell_angle_gamma                 90.00 
_cell_volume                      564.9(4) 
_cell_formula_units_Z             2 
_cell_measurement_temperature     298(2) 
_cell_measurement_reflns_used     ? 
_cell_measurement_theta_min       ? 
_cell_measurement_theta_max       ? 
 
_exptl_crystal_description        'thin plates'   
_exptl_crystal_colour             'silver'   
_exptl_crystal_size_max           0.08 
_exptl_crystal_size_mid           0.05 
_exptl_crystal_size_min           0.05 
_exptl_crystal_density_meas       ? 
_exptl_crystal_density_diffrn     6.911 
_exptl_crystal_density_method     'not measured' 
_exptl_crystal_F_000              1032 
_exptl_absorpt_coefficient_mu     37.516 
_exptl_absorpt_correction_type    'multi-scan'   
_exptl_absorpt_correction_T_min   0.1533 
_exptl_absorpt_correction_T_max   0.2556 
_exptl_absorpt_process_details    'HKL Scalepack (Otwinowski & Minor 1997)'   
 
_exptl_special_details 
; 
 ? 
; 
 
_diffrn_ambient_temperature       298(2) 
_diffrn_radiation_wavelength      0.71073 
_diffrn_radiation_type            MoK\a 
_diffrn_radiation_source          'fine-focus sealed tube' 
_diffrn_radiation_monochromator   graphite 
_diffrn_measurement_device_type   'KappaCCD (with Oxford Cryostram)'   
_diffrn_measurement_method        ' \w scans \k offsets'   
_diffrn_detector_area_resol_mean  ? 
_diffrn_standards_number          ? 
_diffrn_standards_interval_count  ? 
_diffrn_standards_interval_time   ? 
_diffrn_standards_decay_%         none 
_diffrn_reflns_number             1120 
_diffrn_reflns_av_R_equivalents   0.0307 
_diffrn_reflns_av_sigmaI/netI     0.0419 
_diffrn_reflns_limit_h_min        -8 
_diffrn_reflns_limit_h_max        8 
_diffrn_reflns_limit_k_min        -6 
_diffrn_reflns_limit_k_max        6 
_diffrn_reflns_limit_l_min        -21 
_diffrn_reflns_limit_l_max        11 
_diffrn_reflns_theta_min          4.78 
_diffrn_reflns_theta_max          30.01 
_reflns_number_total              456 
_reflns_number_gt                 375 
_reflns_threshold_expression      >2sigma(I) 
 
_computing_data_collection        'COLLECT (Nonius, 2000)'   
_computing_cell_refinement    'Denzo and Scalepack (Otwinowski & Minor, 1997)' 
_computing_data_reduction    'Denzo and Scalepack (Otwinowski & Minor, 1997)' 
_computing_structure_solution     'SHELXS-97 (Sheldrick, 1990)' 
_computing_structure_refinement   'SHELXL-97 (Sheldrick, 1997)' 
_computing_molecular_graphics     ? 
_computing_publication_material   'SHELXL-97 (Sheldrick, 1997)'   
 
_refine_special_details 
; 
 Refinement of F^2^ against ALL reflections.  The weighted R-factor wR and 
 goodness of fit S are based on F^2^, conventional R-factors R are based 
 on F, with F set to zero for negative F^2^. The threshold expression of 
 F^2^ > 2sigma(F^2^) is used only for calculating R-factors(gt) etc. and is 
 not relevant to the choice of reflections for refinement.  R-factors based 
 on F^2^ are statistically about twice as large as those based on F, and R- 
 factors based on ALL data will be even larger. 
; 
 
_refine_ls_structure_factor_coef  Fsqd  
_refine_ls_matrix_type            full 
_refine_ls_weighting_scheme       calc  
_refine_ls_weighting_details 
 'calc w=1/[\s^2^(Fo^2^)+(0.0217P)^2^+2.0965P] where P=(Fo^2^+2Fc^2^)/3' 
_atom_sites_solution_primary      direct 
_atom_sites_solution_secondary    difmap 
_atom_sites_solution_hydrogens    '.' 
_refine_ls_hydrogen_treatment     none 
_refine_ls_extinction_method      SHELXL 
_refine_ls_extinction_coef        0.00103(18) 
_refine_ls_extinction_expression 
 'Fc^*^=kFc[1+0.001xFc^2^\l^3^/sin(2\q)]^-1/4^' 
_refine_ls_number_reflns          456 
_refine_ls_number_parameters      26 
_refine_ls_number_restraints      0 
_refine_ls_R_factor_all           0.0403 
_refine_ls_R_factor_gt            0.0298 
_refine_ls_wR_factor_ref          0.0664 
_refine_ls_wR_factor_gt           0.0624 
_refine_ls_goodness_of_fit_ref    1.104 
_refine_ls_restrained_S_all       1.104 
_refine_ls_shift/su_max           0.000 
_refine_ls_shift/su_mean          0.000 
 
loop_ 
 _atom_site_label 
 _atom_site_type_symbol 
 _atom_site_fract_x 
 _atom_site_fract_y 
 _atom_site_fract_z 
 _atom_site_U_iso_or_equiv 
 _atom_site_adp_type 
 _atom_site_occupancy 
 _atom_site_symmetry_multiplicity 
 _atom_site_calc_flag 
 _atom_site_refinement_flags 
 _atom_site_disorder_assembly 
 _atom_site_disorder_group 
Ce1 Ce 0.7500 0.2500 0.24439(4) 0.00734(19) Uani 1 4 d S . . 
Ni1 Ni 0.7500 0.2500 0.0000 0.0078(4) Uani 1 8 d S . . 
Ga3 Ga 0.50023(9) 0.00023(9) -0.08340(5) 0.0092(2) Uani 1 2 d S . . 
Ga1 Ga 0.7500 0.7500 0.18140(8) 0.0086(3) Uani 1 4 d S . . 
Ga2 Ga 0.7500 0.7500 0.33954(9) 0.0118(3) Uani 1 4 d S . . 
Ga4 Ga 0.57024(12) 0.07024(12) 0.42816(7) 0.0211(3) Uani 1 2 d S . . 
 
loop_ 
 _atom_site_aniso_label 
 _atom_site_aniso_U_11 
 _atom_site_aniso_U_22 
 _atom_site_aniso_U_33 
 _atom_site_aniso_U_23 
 _atom_site_aniso_U_13 
 _atom_site_aniso_U_12 
Ce1 0.0066(2) 0.0066(2) 0.0089(3) 0.000 0.000 -0.0005(2) 
Ni1 0.0072(6) 0.0072(6) 0.0092(10) 0.000 0.000 0.000 
Ga3 0.0096(3) 0.0096(3) 0.0083(5) 0.0000(3) 0.0000(3) -0.0007(3) 
Ga1 0.0083(4) 0.0083(4) 0.0092(7) 0.000 0.000 0.000 
Ga2 0.0124(4) 0.0124(4) 0.0107(7) 0.000 0.000 0.000 
Ga4 0.0242(4) 0.0242(4) 0.0149(5) 0.0053(3) 0.0053(3) 0.0093(4) 
 
_geom_special_details 
; 
 All esds (except the esd in the dihedral angle between two l.s. planes) 
 are estimated using the full covariance matrix.  The cell esds are taken 
 into account individually in the estimation of esds in distances, angles 
 and torsion angles; correlations between esds in cell parameters are only 
 used when they are defined by crystal symmetry.  An approximate (isotropic) 
 treatment of cell esds is used for estimating esds involving l.s. planes. 
; 
 
loop_ 
 _geom_bond_atom_site_label_1 
 _geom_bond_atom_site_label_2 
 _geom_bond_distance 
 _geom_bond_site_symmetry_2 
 _geom_bond_publ_flag 
Ce1 Ga1 3.1721(10) 11_755 ? 
Ce1 Ga1 3.1721(11) 11_655 ? 
Ce1 Ga1 3.1721(11) 1_545 ? 
Ce1 Ga1 3.1721(11) . ? 
Ce1 Ga4 3.2363(17) 2_655 ? 
Ce1 Ga4 3.2363(17) . ? 
Ce1 Ga3 3.2830(14) 3 ? 
Ce1 Ga3 3.2830(14) 4_655 ? 
Ce1 Ga3 3.2855(14) 9_655 ? 
Ce1 Ga3 3.2855(14) 10_665 ? 
Ce1 Ga2 3.3593(11) 11_755 ? 
Ce1 Ga2 3.3593(12) . ? 
Ni1 Ga3 2.4936(10) 4_655 ? 
Ni1 Ga3 2.4936(10) 3 ? 
Ni1 Ga3 2.4936(10) . ? 
Ni1 Ga3 2.4937(10) 2_655 ? 
Ni1 Ga3 2.4969(10) 9_655 ? 
Ni1 Ga3 2.4969(10) 10_665 ? 
Ni1 Ga3 2.4969(10) 12_655 ? 
Ni1 Ga3 2.4969(10) 11_665 ? 
Ga3 Ni1 2.4970(10) 9_655 ? 
Ga3 Ga3 2.586(2) 9_655 ? 
Ga3 Ga1 2.6198(11) 3 ? 
Ga3 Ga1 2.6198(11) 9_665 ? 
Ga3 Ga3 3.0180(10) 12_655 ? 
Ga3 Ga3 3.0180(10) 11_655 ? 
Ga3 Ga3 3.0180(10) 11_665 ? 
Ga3 Ga3 3.0180(10) 12 ? 
Ga3 Ce1 3.2830(14) 3 ? 
Ga3 Ce1 3.2855(14) 9_655 ? 
Ga1 Ga2 2.452(2) . ? 
Ga1 Ga3 2.6198(11) 3 ? 
Ga1 Ga3 2.6198(11) 10_665 ? 
Ga1 Ga3 2.6198(11) 9_665 ? 
Ga1 Ga3 2.6198(11) 4_665 ? 
Ga1 Ce1 3.1721(11) 11_765 ? 
Ga1 Ce1 3.1721(11) 1_565 ? 
Ga1 Ce1 3.1721(11) 11_665 ? 
Ga2 Ga4 2.6080(12) 12_665 ? 
Ga2 Ga4 2.6080(12) 1_565 ? 
Ga2 Ga4 2.6080(12) 2_655 ? 
Ga2 Ga4 2.6080(12) 11_665 ? 
Ga2 Ce1 3.3593(12) 11_765 ? 
Ga2 Ce1 3.3593(11) 1_565 ? 
Ga2 Ce1 3.3593(12) 11_665 ? 
Ga4 Ga4 2.530(2) 9_656 ? 
Ga4 Ga2 2.6080(12) 11_655 ? 
Ga4 Ga2 2.6080(12) 1_545 ? 
 
loop_ 
 _geom_angle_atom_site_label_1 
 _geom_angle_atom_site_label_2 
 _geom_angle_atom_site_label_3 
 _geom_angle 
 _geom_angle_site_symmetry_1 
 _geom_angle_site_symmetry_3 
 _geom_angle_publ_flag 
Ga1 Ce1 Ga1 144.13(5) 11_755 11_655 ? 
Ga1 Ce1 Ga1 84.560(15) 11_755 1_545 ? 
Ga1 Ce1 Ga1 84.559(15) 11_655 1_545 ? 
Ga1 Ce1 Ga1 84.560(15) 11_755 . ? 
Ga1 Ce1 Ga1 84.560(16) 11_655 . ? 
Ga1 Ce1 Ga1 144.13(5) 1_545 . ? 
Ga1 Ce1 Ga4 87.26(3) 11_755 2_655 ? 
Ga1 Ce1 Ga4 126.16(3) 11_655 2_655 ? 
Ga1 Ce1 Ga4 126.16(3) 1_545 2_655 ? 
Ga1 Ce1 Ga4 87.26(3) . 2_655 ? 
Ga1 Ce1 Ga4 126.16(3) 11_755 . ? 
Ga1 Ce1 Ga4 87.26(3) 11_655 . ? 
Ga1 Ce1 Ga4 87.26(3) 1_545 . ? 
Ga1 Ce1 Ga4 126.16(3) . . ? 
Ga4 Ce1 Ga4 56.61(5) 2_655 . ? 
Ga1 Ce1 Ga3 101.70(3) 11_755 3 ? 
Ga1 Ce1 Ga3 47.852(19) 11_655 3 ? 
Ga1 Ce1 Ga3 101.70(3) 1_545 3 ? 
Ga1 Ce1 Ga3 47.851(19) . 3 ? 
Ga4 Ce1 Ga3 132.03(2) 2_655 3 ? 
Ga4 Ce1 Ga3 132.03(2) . 3 ? 
Ga1 Ce1 Ga3 47.851(19) 11_755 4_655 ? 
Ga1 Ce1 Ga3 101.70(3) 11_655 4_655 ? 
Ga1 Ce1 Ga3 47.852(19) 1_545 4_655 ? 
Ga1 Ce1 Ga3 101.70(3) . 4_655 ? 
Ga4 Ce1 Ga3 132.03(2) 2_655 4_655 ? 
Ga4 Ce1 Ga3 132.03(2) . 4_655 ? 
Ga3 Ce1 Ga3 81.00(5) 3 4_655 ? 
Ga1 Ce1 Ga3 101.74(3) 11_755 9_655 ? 
Ga1 Ce1 Ga3 47.830(19) 11_655 9_655 ? 
Ga1 Ce1 Ga3 47.830(19) 1_545 9_655 ? 
Ga1 Ce1 Ga3 101.74(3) . 9_655 ? 
Ga4 Ce1 Ga3 167.75(3) 2_655 9_655 ? 
Ga4 Ce1 Ga3 111.15(4) . 9_655 ? 
Ga3 Ce1 Ga3 54.71(3) 3 9_655 ? 
Ga3 Ce1 Ga3 54.71(3) 4_655 9_655 ? 
Ga1 Ce1 Ga3 47.830(19) 11_755 10_665 ? 
Ga1 Ce1 Ga3 101.74(3) 11_655 10_665 ? 
Ga1 Ce1 Ga3 101.74(3) 1_545 10_665 ? 
Ga1 Ce1 Ga3 47.830(19) . 10_665 ? 
Ga4 Ce1 Ga3 111.15(4) 2_655 10_665 ? 
Ga4 Ce1 Ga3 167.75(3) . 10_665 ? 
Ga3 Ce1 Ga3 54.71(3) 3 10_665 ? 
Ga3 Ce1 Ga3 54.71(3) 4_655 10_665 ? 
Ga3 Ce1 Ga3 81.10(5) 9_655 10_665 ? 
Ga1 Ce1 Ga2 43.98(4) 11_755 11_755 ? 
Ga1 Ce1 Ga2 171.88(4) 11_655 11_755 ? 
Ga1 Ce1 Ga2 97.772(13) 1_545 11_755 ? 
Ga1 Ce1 Ga2 97.772(13) . 11_755 ? 
Ga4 Ce1 Ga2 46.54(2) 2_655 11_755 ? 
Ga4 Ce1 Ga2 85.10(4) . 11_755 ? 
Ga3 Ce1 Ga2 138.290(18) 3 11_755 ? 
Ga3 Ce1 Ga2 85.49(3) 4_655 11_755 ? 
Ga3 Ce1 Ga2 138.305(18) 9_655 11_755 ? 
Ga3 Ce1 Ga2 85.45(3) 10_665 11_755 ? 
Ga1 Ce1 Ga2 97.772(14) 11_755 . ? 
Ga1 Ce1 Ga2 97.772(14) 11_655 . ? 
Ga1 Ce1 Ga2 171.88(4) 1_545 . ? 
Ga1 Ce1 Ga2 43.98(4) . . ? 
Ga4 Ce1 Ga2 46.54(2) 2_655 . ? 
Ga4 Ce1 Ga2 85.10(4) . . ? 
Ga3 Ce1 Ga2 85.49(3) 3 . ? 
Ga3 Ce1 Ga2 138.290(18) 4_655 . ? 
Ga3 Ce1 Ga2 138.305(18) 9_655 . ? 
Ga3 Ce1 Ga2 85.45(3) 10_665 . ? 
Ga2 Ce1 Ga2 78.88(2) 11_755 . ? 
Ga3 Ni1 Ga3 117.53(5) 4_655 3 ? 
Ga3 Ni1 Ga3 105.60(2) 4_655 . ? 
Ga3 Ni1 Ga3 105.60(2) 3 . ? 
Ga3 Ni1 Ga3 105.60(2) 4_655 2_655 ? 
Ga3 Ni1 Ga3 105.60(2) 3 2_655 ? 
Ga3 Ni1 Ga3 117.52(5) . 2_655 ? 
Ga3 Ni1 Ga3 74.42(2) 4_655 9_655 ? 
Ga3 Ni1 Ga3 74.42(2) 3 9_655 ? 
Ga3 Ni1 Ga3 62.43(4) . 9_655 ? 
Ga3 Ni1 Ga3 179.95(2) 2_655 9_655 ? 
Ga3 Ni1 Ga3 74.42(2) 4_655 10_665 ? 
Ga3 Ni1 Ga3 74.42(2) 3 10_665 ? 
Ga3 Ni1 Ga3 179.95(2) . 10_665 ? 
Ga3 Ni1 Ga3 62.43(4) 2_655 10_665 ? 
Ga3 Ni1 Ga3 117.62(5) 9_655 10_665 ? 
Ga3 Ni1 Ga3 62.43(4) 4_655 12_655 ? 
Ga3 Ni1 Ga3 179.95(3) 3 12_655 ? 
Ga3 Ni1 Ga3 74.42(2) . 12_655 ? 
Ga3 Ni1 Ga3 74.42(2) 2_655 12_655 ? 
Ga3 Ni1 Ga3 105.56(2) 9_655 12_655 ? 
Ga3 Ni1 Ga3 105.56(2) 10_665 12_655 ? 
Ga3 Ni1 Ga3 179.95(3) 4_655 11_665 ? 
Ga3 Ni1 Ga3 62.43(4) 3 11_665 ? 
Ga3 Ni1 Ga3 74.42(2) . 11_665 ? 
Ga3 Ni1 Ga3 74.42(2) 2_655 11_665 ? 
Ga3 Ni1 Ga3 105.56(2) 9_655 11_665 ? 
Ga3 Ni1 Ga3 105.56(2) 10_665 11_665 ? 
Ga3 Ni1 Ga3 117.62(5) 12_655 11_665 ? 
Ni1 Ga3 Ni1 117.57(4) . 9_655 ? 
Ni1 Ga3 Ga3 58.85(3) . 9_655 ? 
Ni1 Ga3 Ga3 58.72(3) 9_655 9_655 ? 
Ni1 Ga3 Ga1 107.54(3) . 3 ? 
Ni1 Ga3 Ga1 107.44(3) 9_655 3 ? 
Ga3 Ga3 Ga1 125.45(3) 9_655 3 ? 
Ni1 Ga3 Ga1 107.54(3) . 9_665 ? 
Ni1 Ga3 Ga1 107.44(3) 9_655 9_665 ? 
Ga3 Ga3 Ga1 125.45(3) 9_655 9_665 ? 
Ga1 Ga3 Ga1 109.09(6) 3 9_665 ? 
Ni1 Ga3 Ga3 52.84(2) . 12_655 ? 
Ni1 Ga3 Ga3 127.182(15) 9_655 12_655 ? 
Ga3 Ga3 Ga3 90.06(2) 9_655 12_655 ? 
Ga1 Ga3 Ga3 54.831(16) 3 12_655 ? 
Ga1 Ga3 Ga3 125.24(3) 9_665 12_655 ? 
Ni1 Ga3 Ga3 127.239(15) . 11_655 ? 
Ni1 Ga3 Ga3 52.74(2) 9_655 11_655 ? 
Ga3 Ga3 Ga3 89.94(2) 9_655 11_655 ? 
Ga1 Ga3 Ga3 54.830(16) 3 11_655 ? 
Ga1 Ga3 Ga3 125.10(3) 9_665 11_655 ? 
Ga3 Ga3 Ga3 90.0 12_655 11_655 ? 
Ni1 Ga3 Ga3 52.84(2) . 11_665 ? 
Ni1 Ga3 Ga3 127.182(15) 9_655 11_665 ? 
Ga3 Ga3 Ga3 90.06(2) 9_655 11_665 ? 
Ga1 Ga3 Ga3 125.24(3) 3 11_665 ? 
Ga1 Ga3 Ga3 54.831(16) 9_665 11_665 ? 
Ga3 Ga3 Ga3 90.10(4) 12_655 11_665 ? 
Ga3 Ga3 Ga3 179.90(5) 11_655 11_665 ? 
Ni1 Ga3 Ga3 127.239(16) . 12 ? 
Ni1 Ga3 Ga3 52.74(2) 9_655 12 ? 
Ga3 Ga3 Ga3 89.94(2) 9_655 12 ? 
Ga1 Ga3 Ga3 125.10(3) 3 12 ? 
Ga1 Ga3 Ga3 54.830(16) 9_665 12 ? 
Ga3 Ga3 Ga3 179.90(5) 12_655 12 ? 
Ga3 Ga3 Ga3 89.90(4) 11_655 12 ? 
Ga3 Ga3 Ga3 90.0 11_665 12 ? 
Ni1 Ga3 Ce1 80.74(4) . 3 ? 
Ni1 Ga3 Ce1 161.69(3) 9_655 3 ? 
Ga3 Ga3 Ce1 139.59(5) 9_655 3 ? 
Ga1 Ga3 Ce1 63.86(3) 3 3 ? 
Ga1 Ga3 Ce1 63.86(3) 9_665 3 ? 
Ga3 Ga3 Ce1 62.69(2) 12_655 3 ? 
Ga3 Ga3 Ce1 117.364(14) 11_655 3 ? 
Ga3 Ga3 Ce1 62.69(2) 11_665 3 ? 
Ga3 Ga3 Ce1 117.364(13) 12 3 ? 
Ni1 Ga3 Ce1 161.79(3) . 9_655 ? 
Ni1 Ga3 Ce1 80.64(4) 9_655 9_655 ? 
Ga3 Ga3 Ce1 139.36(5) 9_655 9_655 ? 
Ga1 Ga3 Ce1 63.82(3) 3 9_655 ? 
Ga1 Ga3 Ce1 63.82(3) 9_665 9_655 ? 
Ga3 Ga3 Ce1 117.342(13) 12_655 9_655 ? 
Ga3 Ga3 Ce1 62.60(2) 11_655 9_655 ? 
Ga3 Ga3 Ce1 117.342(13) 11_665 9_655 ? 
Ga3 Ga3 Ce1 62.60(2) 12 9_655 ? 
Ce1 Ga3 Ce1 81.05(4) 3 9_655 ? 
Ga2 Ga1 Ga3 125.45(3) . 3 ? 
Ga2 Ga1 Ga3 125.45(3) . 10_665 ? 
Ga3 Ga1 Ga3 70.34(3) 3 10_665 ? 
Ga2 Ga1 Ga3 125.45(3) . 9_665 ? 
Ga3 Ga1 Ga3 70.34(3) 3 9_665 ? 
Ga3 Ga1 Ga3 109.09(6) 10_665 9_665 ? 
Ga2 Ga1 Ga3 125.45(3) . 4_665 ? 
Ga3 Ga1 Ga3 109.09(6) 3 4_665 ? 
Ga3 Ga1 Ga3 70.34(3) 10_665 4_665 ? 
Ga3 Ga1 Ga3 70.34(3) 9_665 4_665 ? 
Ga2 Ga1 Ce1 72.07(3) . 11_765 ? 
Ga3 Ga1 Ce1 136.56(2) 3 11_765 ? 
Ga3 Ga1 Ce1 68.29(3) 10_665 11_765 ? 
Ga3 Ga1 Ce1 136.64(2) 9_665 11_765 ? 
Ga3 Ga1 Ce1 68.35(3) 4_665 11_765 ? 
Ga2 Ga1 Ce1 72.07(3) . 1_565 ? 
Ga3 Ga1 Ce1 136.64(2) 3 1_565 ? 
Ga3 Ga1 Ce1 136.56(2) 10_665 1_565 ? 
Ga3 Ga1 Ce1 68.35(3) 9_665 1_565 ? 
Ga3 Ga1 Ce1 68.29(3) 4_665 1_565 ? 
Ce1 Ga1 Ce1 84.560(15) 11_765 1_565 ? 
Ga2 Ga1 Ce1 72.07(3) . . ? 
Ga3 Ga1 Ce1 68.29(3) 3 . ? 
Ga3 Ga1 Ce1 68.35(3) 10_665 . ? 
Ga3 Ga1 Ce1 136.56(2) 9_665 . ? 
Ga3 Ga1 Ce1 136.64(2) 4_665 . ? 
Ce1 Ga1 Ce1 84.559(15) 11_765 . ? 
Ce1 Ga1 Ce1 144.13(5) 1_565 . ? 
Ga2 Ga1 Ce1 72.07(3) . 11_665 ? 
Ga3 Ga1 Ce1 68.35(3) 3 11_665 ? 
Ga3 Ga1 Ce1 136.64(2) 10_665 11_665 ? 
Ga3 Ga1 Ce1 68.29(3) 9_665 11_665 ? 
Ga3 Ga1 Ce1 136.56(2) 4_665 11_665 ? 
Ce1 Ga1 Ce1 144.13(5) 11_765 11_665 ? 
Ce1 Ga1 Ce1 84.560(15) 1_565 11_665 ? 
Ce1 Ga1 Ce1 84.559(15) . 11_665 ? 
Ga1 Ga2 Ga4 121.79(4) . 12_665 ? 
Ga1 Ga2 Ga4 121.79(4) . 1_565 ? 
Ga4 Ga2 Ga4 73.88(3) 12_665 1_565 ? 
Ga1 Ga2 Ga4 121.79(4) . 2_655 ? 
Ga4 Ga2 Ga4 73.88(3) 12_665 2_655 ? 
Ga4 Ga2 Ga4 116.41(7) 1_565 2_655 ? 
Ga1 Ga2 Ga4 121.79(4) . 11_665 ? 
Ga4 Ga2 Ga4 116.41(7) 12_665 11_665 ? 
Ga4 Ga2 Ga4 73.88(3) 1_565 11_665 ? 
Ga4 Ga2 Ga4 73.88(3) 2_655 11_665 ? 
Ga1 Ga2 Ce1 63.95(3) . 11_765 ? 
Ga4 Ga2 Ce1 64.25(3) 12_665 11_765 ? 
Ga4 Ga2 Ce1 127.24(2) 1_565 11_765 ? 
Ga4 Ga2 Ce1 81.81(3) 2_655 11_765 ? 
Ga4 Ga2 Ce1 153.80(2) 11_665 11_765 ? 
Ga1 Ga2 Ce1 63.95(3) . 1_565 ? 
Ga4 Ga2 Ce1 81.81(3) 12_665 1_565 ? 
Ga4 Ga2 Ce1 64.25(3) 1_565 1_565 ? 
Ga4 Ga2 Ce1 153.80(2) 2_655 1_565 ? 
Ga4 Ga2 Ce1 127.24(2) 11_665 1_565 ? 
Ce1 Ga2 Ce1 78.88(2) 11_765 1_565 ? 
Ga1 Ga2 Ce1 63.95(3) . . ? 
Ga4 Ga2 Ce1 127.24(2) 12_665 . ? 
Ga4 Ga2 Ce1 153.80(2) 1_565 . ? 
Ga4 Ga2 Ce1 64.25(3) 2_655 . ? 
Ga4 Ga2 Ce1 81.81(3) 11_665 . ? 
Ce1 Ga2 Ce1 78.88(2) 11_765 . ? 
Ce1 Ga2 Ce1 127.90(5) 1_565 . ? 
Ga1 Ga2 Ce1 63.95(3) . 11_665 ? 
Ga4 Ga2 Ce1 153.80(2) 12_665 11_665 ? 
Ga4 Ga2 Ce1 81.81(3) 1_565 11_665 ? 
Ga4 Ga2 Ce1 127.24(2) 2_655 11_665 ? 
Ga4 Ga2 Ce1 64.25(3) 11_665 11_665 ? 
Ce1 Ga2 Ce1 127.90(5) 11_765 11_665 ? 
Ce1 Ga2 Ce1 78.88(2) 1_565 11_665 ? 
Ce1 Ga2 Ce1 78.88(2) . 11_665 ? 
Ga4 Ga4 Ga2 110.79(4) 9_656 11_655 ? 
Ga4 Ga4 Ga2 110.79(4) 9_656 1_545 ? 
Ga2 Ga4 Ga2 109.82(6) 11_655 1_545 ? 
Ga4 Ga4 Ce1 179.99(9) 9_656 . ? 
Ga2 Ga4 Ce1 69.21(4) 11_655 . ? 
Ga2 Ga4 Ce1 69.21(4) 1_545 . ? 
 
_diffrn_measured_fraction_theta_max    0.958 
_diffrn_reflns_theta_full              30.01 
_diffrn_measured_fraction_theta_full   0.958 
_refine_diff_density_max    2.486 
_refine_diff_density_min   -1.396 
_refine_diff_density_rms    0.337 
